# Supplementary material
Source: Springer Nature journal article supplement (https://www.springermedizin.de/resource/supplementary/12967_2010_555_MOESM4_ESM.pdf/9576506)

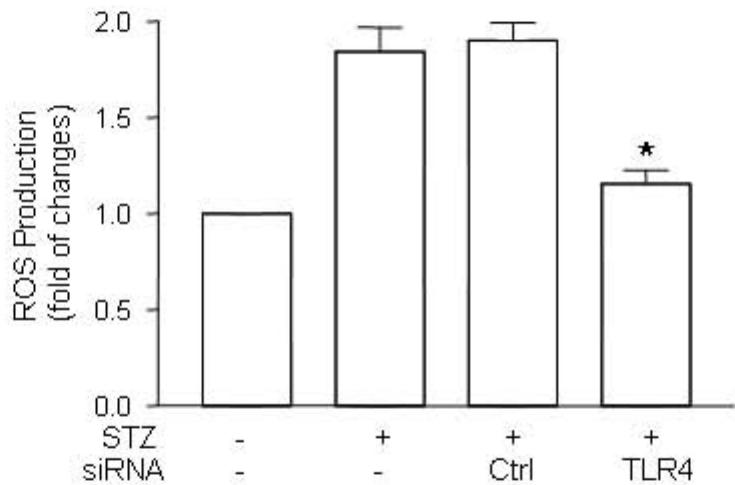

Supplement: MOESM4 [file 9576506]
